# Supplementary material for: Prognostic Models for Mortality and Morbidity in Heart Failure With Preserved Ejection Fraction
Source: PubMed Central journal article supplement — JAMA Cardiol. 2024 Mar 27;9(5):457–65. doi: 10.1001/jamacardio.2024.0284 (PMC10974691; doi:10.1001/jamacardio.2024.0284), 2024-03-27
Supplement: jamacardiol-e240284-s001.pdf [file jamacardiol-e240284-s001.pdf]

## Supplementary Online Content

McDowell K, Kondo T, Talebi A, et al. Prognostic models for mortality and morbidity in heart failure with preserved ejection fraction. *JAMA Cardiol*. Published online March 27, 2024. doi:10.1001/jamacardio.2024.0284

**eTable 1.** Baseline Characteristics and Treatment by End Point in DELIVER Derivation Cohort

**eTable 2.** Event Rate per 100 Person-Years for Each Risk Quintile at 2 Years

**eTable 3.** PREDICT-HFpEF Model for the Outcome of Heart Failure Hospitalization (HFH)

**eTable 4.** Performance of Model for Heart Failure Hospitalization in Derivation (DELIVER) and Validation (PARAGON-HF) Cohort by Harrell C Statistic

**eTable 5.** Model Performance With and Without HF Hospitalization Within Last 6 Months Assessed by Harrell C Statistic

**eTable 6.** Reclassification of Base Model With Addition of NTproBNP and HF Hospitalization Within Last 6 Months

**eTable 7.** List of Candidate Variables and Extent of Missing Data: DELIVER

**eTable 8.** Baseline Characteristics and Treatment by End Point in PARAGON-HF Validation Cohort

**eTable 9.** Baseline Characteristics and Treatment by End Point in I-Preserve Validation Cohort

**eTable 10.** Extent of Missing Data: PARAGON HF and I-Preserve

This supplementary material has been provided by the authors to give readers additional information about their work.

**Supplementary Table 1: Baseline Characteristics and treatment by endpoint in DELIVER derivation cohort**

|                             | HFH/CV death             |                       | CV death                 |                     | All cause mortality      |                       |
|-----------------------------|--------------------------|-----------------------|--------------------------|---------------------|--------------------------|-----------------------|
|                             | Without event<br>N=5,211 | With event<br>N=1,052 | Without event<br>N=5,771 | With event<br>N=492 | Without event<br>N=5,240 | With event<br>N=1,023 |
| Randomized to dapagliflozin | 2,656 (51.0)             | 475 (45.2)            | 2,900 (50.3)             | 231 (47.0)          | 2,634 (50.3)             | 497 (48.6)            |
| Age, yr                     | 71.5±9.5                 | 72.3±9.8              | 71.5±9.5                 | 73.1±9.9            | 71.2±9.5                 | 74.1±9.5              |
| Male-no. (%)                | 2,869 (55.1)             | 647 (61.5)            | 3,205 (55.5)             | 311 (63.2)          | 2,873 (54.8)             | 643 (62.9)            |
| Race-no. (%)                |                          |                       |                          |                     |                          |                       |
| White                       | 3,660 (70.2)             | 779 (74.0)            | 4,066 (70.5)             | 373 (75.8)          | 3,661 (69.9)             | 778 (76.1)            |
| Black                       | 124 ( 2.4)               | 35 ( 3.3)             | 145 ( 2.5)               | 14 ( 2.8)           | 133 ( 2.5)               | 26 ( 2.5)             |
| Asian                       | 1,082 (20.8)             | 192 (18.3)            | 1,207 (20.9)             | 67 (13.6)           | 1,139 (21.7)             | 135 (13.2)            |
| Other                       | 345 ( 6.6)               | 46 ( 4.4)             | 353 ( 6.1)               | 38 ( 7.7)           | 307 ( 5.9)               | 84 ( 8.2)             |
| Region- no. (%)             |                          |                       |                          |                     |                          |                       |
| Europe                      | 2,477 (47.5)             | 528 (50.2)            | 2,748 (47.6)             | 257 (52.2)          | 2,472 (47.2)             | 533 (52.1)            |
| Asia                        | 1,042 (20.0)             | 184 (17.5)            | 1,162 (20.1)             | 64 (13.0)           | 1,100 (21.0)             | 126 (12.3)            |
| North America               | 662 (12.7)               | 189 (18.0)            | 779 (13.5)               | 72 (14.6)           | 711 (13.6)               | 140 (13.7)            |

|                                                |              |            |              |            |              |            |
|------------------------------------------------|--------------|------------|--------------|------------|--------------|------------|
| Latin America                                  | 1,030 (19.8) | 151 (14.4) | 1,082 (18.7) | 99 (20.1)  | 957 (18.3)   | 224 (21.9) |
| Body Mass Index-kg/m <sup>2</sup>              | 29.8±6.0     | 30.1±6.5   | 29.9±6.1     | 29.2±6.3   | 29.9±6.1     | 29.5±6.2   |
| Recent heart failure hospitalization- no.(%)   | 696 (13.4)   | 306 (29.1) | 857 (14.9)   | 145 (29.5) | 763 (14.6)   | 239 (23.4) |
| Prior heart failure hospitalization-no. (%)    | 1,956 (37.5) | 583 (55.4) | 2,270 (39.3) | 269 (54.7) | 2,031 (38.8) | 508 (49.7) |
| Smoker-no.(%)                                  | 2,227 (42.7) | 518 (49.2) | 2,500 (43.3) | 245 (49.8) | 2,271 (43.3) | 474 (46.3) |
| Left ventricular ejection fraction- %          | 4.0±4.8      | 4.6±5.0    | 4.0±4.8      | 5.1±5.0    | 4.0±4.8      | 4.6±4.9    |
| NYHA functional classification-no.(%)          |              |            |              |            |              |            |
| I                                              | 0 ( 0.0)     | 1 ( 0.1)   | 1 ( 0.0)     | 0 ( 0.0)   | 1 ( 0.0)     | 0 ( 0.0)   |
| II                                             | 4,023 (77.2) | 690 (65.6) | 4,394 (76.1) | 319 (64.8) | 4,030 (76.9) | 683 (66.8) |
| III                                            | 1,179 (22.6) | 352 (33.5) | 1,360 (23.6) | 171 (34.8) | 1,197 (22.8) | 334 (32.6) |
| IV                                             | 9 ( 0.2)     | 9 ( 0.9)   | 16 ( 0.3)    | 2 ( 0.4)   | 12 ( 0.2)    | 6 ( 0.6)   |
| Pulse-beats/min                                | 71.2±11.7    | 72.9±11.9  | 71.4±11.7    | 72.1±11.7  | 71.4±11.8    | 72.0±11.6  |
| Systolic blood pressure-mmHg                   | 128.3±15.2   | 127.9±16.1 | 128.4±15.3   | 126.6±15.3 | 128.4±15.3   | 127.4±15.7 |
| Heart failure duration more than 1year-no. (%) | 3,481 (66.9) | 775 (73.7) | 3,894 (67.5) | 362 (73.6) | 3,515 (67.1) | 741 (72.5) |
| Asthma-no.(%)                                  | 310 ( 6.0)   | 80 ( 7.6)  | 361 ( 6.3)   | 29 ( 5.9)  | 332 ( 6.3)   | 58 ( 5.7)  |
| Chronic Obstructive Pulmonary Disease-no.(%)   | 516 ( 9.9)   | 176 (16.7) | 605 (10.5)   | 87 (17.7)  | 544 (10.4)   | 148 (14.5) |

|                                              |              |              |              |            |              |              |
|----------------------------------------------|--------------|--------------|--------------|------------|--------------|--------------|
| Type 2 Diabetes Mellitus-no.(%)              | 2,260 (43.4) | 546 (51.9)   | 2,568 (44.5) | 238 (48.4) | 2,306 (44.0) | 500 (48.9)   |
| Angina Pectoris-no.(%)                       | 1,239 (23.8) | 258 (24.5)   | 1,369 (23.7) | 128 (26.0) | 1,224 (23.4) | 273 (26.7)   |
| Myocardial Infarction-no.(%)                 | 1,326 (25.4) | 313 (29.8)   | 1,480 (25.6) | 159 (32.3) | 1,332 (25.4) | 307 (30.0)   |
| Coronary Artery Bypass Graft-no.(%)          | 589 (11.3)   | 162 (15.4)   | 685 (11.9)   | 66 (13.4)  | 606 (11.6)   | 145 (14.2)   |
| Atrial Fibrillation-no.(%)                   | 2,827 (54.3) | 638 (60.6)   | 3,186 (55.2) | 279 (56.7) | 2,876 (54.9) | 589 (57.6)   |
| Hypertension-no.(%)                          | 4,599 (88.3) | 954 (90.7)   | 5,106 (88.5) | 447 (90.9) | 4,629 (88.3) | 924 (90.3)   |
| TIA/Stroke-no.(%)                            | 596 (11.4)   | 176 (16.7)   | 681 (11.8)   | 91 (18.5)  | 603 (11.5)   | 169 (16.5)   |
| Peripheral arterial disease-no.(%)           | 2,205 (42.3) | 492 (46.8)   | 2,465 (42.7) | 232 (47.2) | 2,211 (42.2) | 486 (47.5)   |
| Pacemaker insertion-no.(%)                   | 600 (11.5)   | 157 (14.9)   | 681 (11.8)   | 76 (15.4)  | 605 (11.5)   | 152 (14.9)   |
| Chronic Kidney Disease-no.(%)                | 1,383 (26.5) | 383 (36.4)   | 1,599 (27.7) | 167 (33.9) | 1,404 (26.8) | 362 (35.4)   |
| Malignant Neoplasm -no.(%)                   | 239 ( 4.6)   | 65 ( 6.2)    | 284 ( 4.9)   | 20 ( 4.1)  | 247 ( 4.7)   | 57 ( 5.6)    |
| Mineralocorticoid receptor antagonist-no.(%) | 2,216 (42.5) | 451 (42.9)   | 2,438 (42.3) | 229 (46.5) | 2,213 (42.2) | 454 (44.4)   |
| Sacubitril/Valsartan -no.(%)                 | 240 ( 4.6)   | 61 ( 5.8)    | 280 ( 4.9)   | 21 ( 4.3)  | 251 ( 4.8)   | 50 ( 4.9)    |
| Diuretics-no.(%)                             | 5,094 (97.8) | 1,029 (97.9) | 5,640 (97.8) | 483 (98.2) | 5,118 (97.7) | 1,005 (98.2) |

Data are presented as mean±SD for continuous measures, and n (%) for categorical measures.

Abbreviations: CV, Cardiovascular; HFH, heart failure hospitalisation; NYHA, New York Heart Association; TIA, transient ischaemic attack.

**Supplementary Table 2: Event rate per 100 person-years for each risk quintile at 2 years**

| <b>Quintile Risk</b> | <b>No of Events</b> | <b>Crude rate per 100 person-years</b> |
|----------------------|---------------------|----------------------------------------|
| HFH/CV death         |                     |                                        |
| 1                    | 65                  | 2.27 (1.78-2.91)                       |
| 2                    | 84                  | 2.98 (2.41-3.69)                       |
| 3                    | 141                 | 5.16 (4.37-6.08)                       |
| 4                    | 218                 | 8.54 (7.48-9.78)                       |
| 5                    | 385                 | 17.3 (15.7-19.2)                       |
| CV death             |                     |                                        |
| 1                    | 35                  | 1.21 (0.87-1.69)                       |
| 2                    | 34                  | 1.17 (0.84-1.64)                       |
| 3                    | 55                  | 1.90 (1.46-2.47)                       |
| 4                    | 80                  | 2.86 (2.29-3.56)                       |
| 5                    | 183                 | 7.14 (6.18-8.25)                       |
| All cause death      |                     |                                        |
| 1                    | 62                  | 2.08 (1.62-2.67)                       |
| 2                    | 97                  | 3.33 (2.73-4.07)                       |
| 3                    | 131                 | 4.58 (3.86-5.43)                       |
| 4                    | 171                 | 6.11 (5.26-7.10)                       |
| 5                    | 328                 | 13.0 (11.68-14.50)                     |

**Supplementary Table 3: PREDICT-HFpEF model for the outcome of heart failure hospitalization (HFH).**

| Variable                           | Hazard Ratio     | Chi-square | Coefficient | P value |
|------------------------------------|------------------|------------|-------------|---------|
| NTproBNP (per log unit increase)   | 1.57(1.44-1.71)  | 10.3       | 0.445       | <0.001  |
| HFH last 6 months                  | 1.83 (1.51-2.21) | 6.22       | 0.603       | <0.001  |
| North America                      | 1.75(1.45-2.12)  | 5.86       | 0.562       | <0.001  |
| Creatinine (per 5)                 | 1.03(1.44-1.04)  | 5.17       | 0.029       | <0.001  |
| ARNI therapy                       | 2.07(1.52-2.81)  | 4.66       | 0.726       | <0.001  |
| HFH (any previous)                 | 1.44(1.19-1.73)  | 4.10       | 0.369       | <0.001  |
| Not receiving dapagliflozin        | 1.34(1.16-1.55)  | 4.00       | 0.296       | <0.001  |
| History of coronary artery disease | 1.44(1.19-1.76)  | 3.69       | 0.368       | <0.001  |
| Heart rate (per 10 bpm increase)   | 1.11(1.04-1.17)  | 3.37       | 0.110       | 0.001   |
| Interaction term                   |                  |            |             |         |
| On ARNI from North America         | 0.25 (0.10-0.63) | -2.92      | -1.407      | 0.004   |

**Supplementary Table 4: Performance of model for heart failure hospitalization in derivation (DELIVER) and validation (PARAGON-HF) cohort by Harrell's C statistic**

|         | DELIVER              | PARAGON-HF           |
|---------|----------------------|----------------------|
|         | C statistic (95% CI) | C statistic (95% CI) |
| Overall | 0.72(0.70-0.74)      | 0.66(0.64-0.67)      |
| 1 year  | 0.74(0.72-0.77)      | 0.71(0.68-0.74)      |
| 2 years | 0.73(0.71-0.75)      | 0.66(0.64-0.68)      |

**Supplementary Table 5: Model performance with and without HF Hospitalization within last 6 months assessed by Harrell's C statistic**

|                     | <b>(1)</b><br><b>C statistic (95% CI)</b><br><b>for HFH within last</b><br><b>6 months alone</b> | <b>(2)</b><br><b>C statistic (95% CI)</b><br><b>for baseline model</b><br><b>without HFH within</b><br><b>last 6 months</b> | <b>(3)</b><br><b>C statistic (95% CI)</b><br><b>for baseline model</b><br><b>with HFH within</b><br><b>last 6 months</b> | <b>Difference in C-</b><br><b>statistic (95% CI),</b><br><b>p-value</b><br><b>(2) versus (1)</b> | <b>Difference in C-</b><br><b>statistic (95% CI),</b><br><b>p-value</b><br><b>(3) versus (1)</b> |
|---------------------|--------------------------------------------------------------------------------------------------|-----------------------------------------------------------------------------------------------------------------------------|--------------------------------------------------------------------------------------------------------------------------|--------------------------------------------------------------------------------------------------|--------------------------------------------------------------------------------------------------|
| <b>HFH/CV death</b> |                                                                                                  |                                                                                                                             |                                                                                                                          |                                                                                                  |                                                                                                  |
| <b>1 year</b>       | 0.59<br>(0.58-0.62)                                                                              | 0.72<br>(0.70-0.74)                                                                                                         | 0.73<br>(0.71-0.75)                                                                                                      | 0.13<br>(0.09-0.15)<br>P <0.001                                                                  | 0.14<br>(0.11-0.15)<br>P <0.001                                                                  |
| <b>2 years</b>      | 0.58<br>(0.56-0.60)                                                                              | 0.70<br>(0.68-0.72)                                                                                                         | 0.71<br>(0.69-0.73)                                                                                                      | 0.12<br>(0.10-0.14)<br>P <0.001                                                                  | 0.13<br>(0.11-0.14)<br>P <0.001                                                                  |
| <b>CV death</b>     |                                                                                                  |                                                                                                                             |                                                                                                                          |                                                                                                  |                                                                                                  |
| <b>1 year</b>       | 0.60<br>(0.57-0.63)                                                                              | 0.73<br>(0.69-0.77)                                                                                                         | 0.75<br>(0.71-0.79)                                                                                                      | 0.13<br>(0.09-0.18)                                                                              | 0.14<br>(0.11-0.19)                                                                              |



|                        |                     |                     |                     |                                 |                                 |
|------------------------|---------------------|---------------------|---------------------|---------------------------------|---------------------------------|
|                        |                     |                     |                     | P <0.001                        | P <0.001                        |
| <b>2 years</b>         | 0.58<br>(0.66-0.60) | 0.70<br>(0.67-0.72) | 0.71<br>(0.68-0.74) | 0.12<br>(0.08-0.15)<br>P <0.001 | 0.13<br>(0.11-0.14)<br>P <0.001 |
| <b>All cause death</b> |                     |                     |                     |                                 |                                 |
| <b>1 year</b>          | 0.57<br>(0.54-0.59) | 0.70<br>(0.67-0.63) | 0.71<br>(0.68-0.74) | 0.13<br>(0.10-0.16)<br>P <0.001 | 0.14<br>(0.10-0.16)<br>P <0.001 |
| <b>2 years</b>         | 0.55<br>(0.54-0.57) | 0.68<br>(0.66-0.70) | 0.68<br>(0.66-0.70) | 0.13<br>(0.11-0.15)<br>P <0.001 | 0.13<br>(0.11-0.15)<br>P <0.001 |

**Supplementary Table 6: Reclassification of base model with addition of NTproBNP and HF Hospitalization within last 6 months**

|                     | Addition of NTproBNP to model      |                                    | Addition of HF Hospitalization within 6 months to model |                                    |
|---------------------|------------------------------------|------------------------------------|---------------------------------------------------------|------------------------------------|
|                     | IDI<br>(95% CI)                    | NRI<br>(95% CI)                    | IDI<br>(95% CI)                                         | NRI<br>(95% CI)                    |
| <b>HFH/CV death</b> |                                    |                                    |                                                         |                                    |
| <b>1 year</b>       | 0.022<br>(0.012-0.033)<br>P <0.001 | 0.177<br>(0.135-0.225)<br>P <0.001 | 0.011<br>(0.004-0.019)<br>P <0.001                      | 0.059<br>(0.006-0.112)<br>P <0.02  |
| <b>2 years</b>      | 0.023<br>(0.014-0.036)<br>P <0.001 | 0.190<br>(0.150-0.239)<br>P <0.001 | 0.012<br>(0.006-0.019)<br>P <0.001                      | 0.055<br>(0.005-0.098)<br>P <0.03  |
| <b>CV death</b>     |                                    |                                    |                                                         |                                    |
| <b>1 year</b>       | 0.021<br>(0.010-0.043)<br>P <0.001 | 0.214<br>(0.125-0.295)<br>P <0.001 | 0.090<br>(0.003-0.022)<br>P 0.007                       | 0.204<br>(0.123-0.272)<br>P <0.001 |
| <b>2 years</b>      | 0.019<br>(0.010-0.033)             | 0.160<br>(0.004-0.017)             | 0.011<br>(0.004-0.021)                                  | 0.164<br>(0.122-0.210)             |

|                        | P <0.001)                          | P <0.001)                          | P <0.001                            | P <0.001                            |
|------------------------|------------------------------------|------------------------------------|-------------------------------------|-------------------------------------|
| <b>All cause death</b> |                                    |                                    |                                     |                                     |
| <b>1 year</b>          | 0.023<br>(0.013-0.040)<br>P <0.001 | 0.181<br>(0.122-0.236)<br>P <0.001 | 0.003<br>(0.0-0.008)<br>P <0.02     | -0.021<br>(-0.075-0.041)<br>P 0.645 |
| <b>2 years</b>         | 0.022<br>(0.014-0.035)<br>P <0.001 | 0.130<br>(0.088-0.174)<br>P <0.001 | 0.004<br>(0.00.1-0.008)<br>P <0.001 | -0.016<br>(-0.054-0.035)<br>P 0.61  |

**Supplementary Table 7: List of Candidate Variables and extent of missing data: DELIVER**

|                                        | Missing-no. (%) |
|----------------------------------------|-----------------|
| Dapagliflozin                          | 0               |
| Age                                    | 0               |
| Male                                   | 0               |
| Race                                   | 0               |
| Region                                 | 0               |
| Body mass index                        | 0               |
| Recent heart failure hospitalisation   | 0               |
| Previous heart failure hospitalisation | 0               |
| Smoker                                 | 0               |
| Left ventricular ejection fraction     | 0               |
| NYHA functional classification         | 0               |
| Heart rate                             | 0               |
| Systolic blood pressure                | 0               |

|                                       |          |
|---------------------------------------|----------|
| Heart failure duration                | 0        |
| Asthma                                | 2 (0.03) |
| Chronic obstructive pulmonary disease | 2 (0.03) |
| Diabetes                              | 0        |
| Angina                                | 0        |
| Myocardial infarction                 | 0        |
| Coronary artery bypass graft          | 0        |
| Hypertension                          | 0        |
| Atrial fibrillation                   | 0        |
| Peripheral arterial disease           | 0        |
| Transient ischaemic attack/Stroke     | 0        |
| Malignancy                            | 0        |
| Pacemaker                             | 0        |
| Chronic kidney disease                | 0        |
| Mineralocorticoid receptor antagonist | 2 (0.03) |
| Sacubitril/Valsartan                  | 2 (0.03) |

|            |           |
|------------|-----------|
| Diuretic   | 2 (0.03)  |
| Creatinine | 1 (0.015) |
| NTproBNP   | 1 (0.015) |

**Supplementary Table 8: Baseline Characteristics and treatment by endpoint in PARAGON-HF validation cohort**

|                 | HFH/CV death   |                | CV death        |               | All cause mortality |                |
|-----------------|----------------|----------------|-----------------|---------------|---------------------|----------------|
|                 | Without event  | With event     | Without event   | With event    | Without event       | With event     |
|                 | <b>N=3,713</b> | <b>N=1,083</b> | <b>N= 4,380</b> | <b>N= 416</b> | <b>N= 4,105</b>     | <b>N = 691</b> |
| Age- yrs        | 72.4±8.3       | 74.1±8.6       | 72.5±8.4        | 75.0±8.3      | 72.3±8.4            | 75.4±8.2       |
| Male- no. (%)   | 1,758 (47.3)   | 559 (51.6)     | 2,086 (47.6)    | 231 (55.5)    | 1,938 (47.2)        | 379 (54.8)     |
| Race- no (%)    |                |                |                 |               |                     |                |
| White           | 3,035 (81.7)   | 872 (80.5)     | 3,574 (81.6)    | 333 (80.0)    | 3,338 (81.3)        | 569 (82.3)     |
| Black           | 68 ( 1.8)      | 34 ( 3.1)      | 94 ( 2.1)       | 8 ( 1.9)      | 91 ( 2.2)           | 11 ( 1.6)      |
| Asian           | 456 (12.3)     | 151 (13.9)     | 544 (12.4)      | 63 (15.1)     | 518 (12.6)          | 89 (12.9)      |
| Other           | 154 (4.1)      | 26 (2.4)       | 168 ( 3.8)      | 12 (2.9)      | 158 ( 3.8)          | 22 ( 3.1)      |
| Region- no. (%) |                |                |                 |               |                     |                |
| Europe          | 2476 (66.6)    | 629 (58.0)     | 2857 (59.1)     | 248 (59.6)    | 2669 (65.0)         | 315(45.5)      |
| Asia            | 568 (15.3)     | 194 (17.9)     | 683 (15.6)      | 79 (19.0)     | 647 (15.8)          | 115 (16.6)     |
| North America   | 358 ( 9.6)     | 201 (18.6)     | 498 (11.4)      | 61 (14.7)     | 469 (11.4)          | 90 (13.0)      |
| Latin America   | 311 ( 8.4)     | 59 ( 5.4)      | 342 ( 7.8)      | 28 ( 6.7)     | 320 ( 7.8)          | 50 ( 7.2)      |

|                                                |              |            |              |            |              |            |
|------------------------------------------------|--------------|------------|--------------|------------|--------------|------------|
| Body Mass Index- kg/m <sup>2</sup>             | 30.2±4.9     | 30.4±5.2   | 30.3±5.0     | 29.5±4.9   | 30.3±5.0     | 29.6±5.0   |
| Recent heart failure hospitalization- no.(%)   | 1,111 (29.9) | 509 (47.0) | 1,446 (33.0) | 174 (41.8) | 1,345 (32.8) | 275 (39.8) |
| Prior heart failure hospitalization-no. (%)    | 1,621 (43.7) | 685 (63.3) | 2,067 (47.2) | 239 (57.5) | 1,922 (46.8) | 384 (55.6) |
| Smoker-no.(%)                                  | 276 ( 7.5)   | 77 ( 7.2)  | 322 ( 7.4)   | 31 ( 7.5)  | 306 ( 7.5)   | 47 ( 6.9)  |
| Left ventricular ejection fraction- %          | 31.2±7.9     | 32.3±7.8   | 31.3±7.9     | 33.3±7.7   | 31.3±7.9     | 32.6±7.8   |
| NYHA functional classification-no.(%)          |              |            |              |            |              |            |
| I                                              | 107 ( 2.9)   | 30 ( 2.8)  | 128 ( 2.9)   | 9 ( 2.2)   | 124 ( 3.0)   | 13 ( 1.9)  |
| II                                             | 2,925 (78.8) | 781 (72.2) | 3,406 (77.8) | 300 (72.1) | 3,206 (78.1) | 500 (72.4) |
| III                                            | 669 (18.0)   | 263 (24.3) | 831 (19.0)   | 101 (24.3) | 761 (18.5)   | 171 (24.7) |
| IV                                             | 11 ( 0.3)    | 8 ( 0.7)   | 13 ( 0.3)    | 6 ( 1.4)   | 12 ( 0.3)    | 7 ( 1.0)   |
| Pulse-beats/min                                | 70.0±12.1    | 71.8±12.7  | 70.2±12.2    | 72.7±12.7  | 70.1±12.1    | 72.6±12.8  |
| Systolic blood pressure-mmHg                   | 130.4±15.1   | 131.1±16.6 | 130.6±15.4   | 130.2±16.4 | 130.7±15.3   | 129.9±16.5 |
| Heart failure duration more than 1year-no. (%) | 2,117 (57.1) | 692 (64.1) | 2,553 (58.4) | 256 (61.5) | 2,380 (58.1) | 429 (62.1) |
| Asthma-no.(%)                                  | 262 ( 7.1)   | 86 ( 7.9)  | 320 ( 7.3)   | 28 ( 6.7)  | 303 ( 7.4)   | 45 ( 6.5)  |
| Chronic Obstructive Pulmonary Disease-no.(%)   | 441 (11.9)   | 229 (21.1) | 585 (13.4)   | 85 (20.4)  | 525 (12.8)   | 145 (21.0) |
| Type 2 Diabetes Mellitus-no.(%)                | 1,511 (40.7) | 551 (50.9) | 1,851 (42.3) | 211 (50.7) | 1,702 (41.5) | 360 (52.1) |



|                                              |              |              |              |            |              |            |
|----------------------------------------------|--------------|--------------|--------------|------------|--------------|------------|
| Angina Pectoris-no.(%)                       | 1,029 (27.7) | 359 (33.1)   | 1,246 (28.4) | 142 (34.1) | 1,170 (28.5) | 218 (31.5) |
| Myocardial Infarction-no.(%)                 | 787 (21.2)   | 296 (27.3)   | 952 (21.7)   | 131 (31.5) | 891 (21.7)   | 192 (27.8) |
| Coronary Artery Bypass Graft-no.(%)          | 397 (10.7)   | 173 (16.0)   | 498 (11.4)   | 72 (17.3)  | 461 (11.2)   | 109 (15.8) |
| Atrial Fibrillation-no.(%)                   | 1,064 (28.7) | 339 (31.3)   | 1,266 (28.9) | 137 (32.9) | 1,153 (28.1) | 250 (36.2) |
| Hypertension-no.(%)                          | 3,544 (95.4) | 1,040 (96.0) | 4,185 (95.5) | 399 (95.9) | 3,920 (95.5) | 664 (96.1) |
| TIA/Stroke- no. (%)                          | 491 (13.2)   | 191 (17.6)   | 588 (13.4)   | 94 (22.6)  | 551 (13.4)   | 131 (19.0) |
| Peripheral arterial disease-no.(%)           | 291 ( 7.8)   | 115 (10.6)   | 356 ( 8.1)   | 50 (12.0)  | 326 ( 7.9)   | 80 (11.6)  |
| Pacemaker insertion-no.(%)                   | 344 ( 9.3)   | 115 (10.6)   | 427 ( 9.7)   | 32 ( 7.7)  | 386 ( 9.4)   | 73 (10.6)  |
| Malignant Neoplasm -no.(%)                   | 336 ( 9.1)   | 97 ( 9.0)    | 401 ( 9.2)   | 32 ( 7.7)  | 369 ( 9.0)   | 64 ( 9.3)  |
| Mineralocorticoid receptor antagonist-no.(%) | 917 (24.7)   | 322 (29.7)   | 1,118 (25.5) | 121 (29.1) | 1,051 (25.6) | 188 (27.2) |
| Sacubitril/Valsartan -no.(%)                 | 1,881 (50.7) | 526 (48.6)   | 2,203 (50.3) | 204 (49.0) | 2,065 (50.3) | 342 (49.5) |
| Diuretics-no.(%)                             | 3,540 (95.3) | 1,045 (96.5) | 4,188 (95.6) | 397 (95.4) | 3,916 (95.4) | 669 (96.8) |

Data are presented as mean±SD for continuous measures, and n (%) for categorical measures.

Abbreviations: CV, Cardiovascular; HFH, heart failure hospitalisation; NYHA, New York Heart Association; TIA, transient ischaemic attack.

**Supplementary Table 9: Baseline Characteristics and treatment by endpoint in I-Preserve validation cohort**

|               | HFH/CV death             |                       | CV death                  |                     | All cause mortality       |                     |
|---------------|--------------------------|-----------------------|---------------------------|---------------------|---------------------------|---------------------|
|               | Without event<br>N=3,075 | With event<br>N=1,053 | Without event<br>N= 3,515 | With event<br>N=613 | Without event<br>N =3,247 | With event<br>N=881 |
| Age- yrs      | 70.8±6.7                 | 74.0±7.2              | 71.2±6.8                  | 74.1±7.4            | 70.9±6.6                  | 74.5±7.5            |
| Male-no (%)   | 1,168 (38.0)             | 469 (44.5)            | 1,341 (38.2)              | 296 (48.3)          | 1,203 (37.0)              | 434 (49.3)          |
| Race-no (%)   |                          |                       |                           |                     |                           |                     |
| White         | 2,859 (93.0)             | 1,000 (95.0)          | 3,281 (93.3)              | 578 (94.3)          | 3,036 (93.5)              | 823 (93.4)          |
| Black         | 55 ( 1.8)                | 27 ( 2.6)             | 65 ( 1.8)                 | 17 ( 2.8)           | 56 ( 1.7)                 | 26 ( 3.0)           |
| Asian         | 31 ( 1.0)                | 3 ( 0.3)              | 32 ( 0.9)                 | 2 ( 0.3)            | 30 ( 0.9)                 | 4 ( 0.5)            |
| Other         | 130 ( 4.2)               | 23 ( 2.2)             | 137 ( 3.9)                | 16 ( 2.6)           | 125 ( 3.8)                | 28 ( 3.2)           |
| Region-no (%) |                          |                       |                           |                     |                           |                     |
| Europe        | 2204 (71.7)              | 734 (69.7)            | 2497 (71.0)               | 442 (72.1)          | 2323 (71.5)               | 616 (70.0)          |
| Asia          | 67 (2.2)                 | 21 (0.2)              | 76 (2.2)                  | 12 (2.0)            | 66 (2.0)                  | 22 (2.5)            |
| North America | 246 ( 8.0)               | 139 (13.2)            | 316 ( 9.0)                | 69 (11.3)           | 282 ( 8.7)                | 103 (11.7)          |

|                                                    |              |            |              |            |              |            |
|----------------------------------------------------|--------------|------------|--------------|------------|--------------|------------|
| Latin America                                      | 558 (18.1)   | 158 (15.0) | 626 (17.8)   | 90 (14.7)  | 576 (17.7)   | 140 (15.9) |
| Body Mass Index kg/m <sup>2</sup>                  | 29.6±5.1     | 29.6±5.8   | 29.7±5.2     | 29.1±5.8   | 29.8±5.1     | 29.1±5.7   |
| Recent heart failure hospitalization-<br>no.(%)    | 1,165 (37.9) | 651 (61.8) | 1,461 (41.6) | 355 (57.9) | 1,323 (40.7) | 493 (56.0) |
| Left ventricular ejection fraction- %              | 60.1±9.1     | 57.6±9.2   | 59.9±9.1     | 57.0±9.3   | 59.9±9.0     | 57.6±9.6   |
| NYHA functional classification-no.(%)              |              |            |              |            |              |            |
| I                                                  | 1 ( 0.0)     | 0 ( 0.0)   | 1 ( 0.0)     | 0 ( 0.0)   | 1 ( 0.0)     | 0 ( 0.0)   |
| II                                                 | 612 (19.9)   | 258 (24.5) | 740 (21.1)   | 130 (21.2) | 683 (21.0)   | 187 (21.2) |
| III                                                | 2,403 (78.2) | 741 (70.4) | 2,697 (76.8) | 447 (72.9) | 2,495 (76.9) | 649 (73.7) |
| IV                                                 | 58 ( 1.9)    | 54 ( 5.1)  | 76 ( 2.2)    | 36 ( 5.9)  | 67 ( 2.1)    | 45 ( 5.1)  |
| Pulse-beats/min                                    | 70.8±10.2    | 73.4±11.0  | 71.0±10.2    | 73.8±11.3  | 70.9±10.1    | 73.5±11.4  |
| Systolic blood pressure-mmHg                       | 136.5±14.6   | 135.8±16.2 | 136.5±14.6   | 135.6±16.9 | 136.6±14.5   | 135.6±16.8 |
| Heart failure duration more than 1year-<br>no. (%) | 1,493 (48.6) | 504 (47.9) | 1,732 (49.3) | 265 (43.2) | 1,589 (48.9) | 408 (46.3) |
| Asthma-no.(%)                                      | 242 ( 7.9)   | 149 (14.2) | 313 ( 8.9)   | 78 (12.7)  | 270 ( 8.3)   | 121 (13.7) |

|                                              |              |            |              |            |              |            |
|----------------------------------------------|--------------|------------|--------------|------------|--------------|------------|
| Chronic Obstructive Pulmonary Disease-no.(%) | 743 (24.2)   | 391 (37.1) | 914 (26.0)   | 220 (35.9) | 820 (25.3)   | 314 (35.6) |
| Type 2 Diabetes Mellitus-no.(%)              | 1,215 (39.5) | 437 (41.5) | 1,386 (39.4) | 266 (43.4) | 1,303 (40.1) | 349 (39.6) |
| Myocardial Infarction-no.(%)                 | 668 (21.7)   | 301 (28.6) | 770 (21.9)   | 199 (32.5) | 702 (21.6)   | 267 (30.3) |
| Coronary Artery Bypass Graft-no.(%)          | 381 (12.4)   | 167 (15.9) | 457 (13.0)   | 91 (14.8)  | 413 (12.7)   | 135 (15.3) |
| Atrial Fibrillation-no.(%)                   | 746 (24.3)   | 463 (44.0) | 955 (27.2)   | 254 (41.4) | 850 (26.2)   | 359 (40.7) |
| Hypertension-no.(%)                          | 2,733 (88.9) | 917 (87.1) | 3,124 (88.9) | 526 (85.8) | 2,897 (89.2) | 753 (85.5) |
| TIA/Stroke- no. (%)                          | 261 ( 8.5)   | 138 (13.1) | 308 ( 8.8)   | 91 (14.8)  | 273 ( 8.4)   | 126 (14.3) |
| Pacemaker insertion-no.(%)                   | 141 ( 4.6)   | 111 (10.5) | 195 ( 5.5)   | 57 ( 9.3)  | 170 ( 5.2)   | 82 ( 9.3)  |
| Mineralocorticoid receptor antagonist-no.(%) | 378 (12.7)   | 243 (23.8) | 481 (14.2)   | 140 (23.4) | 421 (13.4)   | 200 (23.4) |
| Diuretics-no.(%)                             | 2,401 (80.9) | 922 (90.3) | 2,786 (82.1) | 537 (89.8) | 2,568 (81.9) | 755 (88.3) |

Data are presented as mean±SD for continuous measures, and n (%) for categorical measures.

**Supplementary Table 10: Extent of missing data: PARAGON HF and I-Preserve**

|                                            | Missing-no. (%) |            |
|--------------------------------------------|-----------------|------------|
|                                            | PARAGON-HF      | I-Preserve |
| NTproBNP                                   | 39 (0.8)        | 648 (15.7) |
| Recent heart failure hospitalisation       | 0               | 0          |
| Creatinine                                 | 1 (0.02)        | 90 (2.2)   |
| Transient ischaemic attack/Stroke          | 0               | 0          |
| Dapagliflozin                              | 0               | 0          |
| Chronic obstructive pulmonary disease      | 0               | 0          |
| Previous heart failure hospitalisation     | 0               | *2312      |
| Diabetes                                   | 0               | 0          |
| Age                                        | 0               | 0          |
| Region: (N America)                        | 0               | 0          |
| Heart failure duration greater than 1 year | 12 (0.3)        | 0          |
| Heart rate                                 | 1 (0.02)        | 4 (0.09)   |
| Body mass index                            | 2 (0.04)        | 19 (0.46)  |
| Region: Asia                               | 0               | 0          |
| Left ventricular ejection fraction         | 0               | 3 (0.07)   |
| Region: Latin America                      | 0               | 0          |
| Male                                       | 0               | 0          |
| NYHA functional classification             | 2 (0.04)        | 1 (0.02)   |

**\*Data only available for heart failure hospitalisation in last 6 months**
