# Supplementary material for: Prognostic Models for Mortality and Morbidity in Heart Failure With Preserved Ejection Fraction
Source: PubMed Central journal article supplement — JAMA Cardiol. 2024 Mar 27;9(5):457–65. doi: 10.1001/jamacardio.2024.0284 (PMC10974691; doi:10.1001/jamacardio.2024.0284), 2024-03-27
Supplement: jamacardiol-e240284-s002.pdf [file jamacardiol-e240284-s002.pdf]

## Data Sharing Statement

McDowell. Prognostic Models for Mortality and Morbidity in Heart Failure With Preserved Ejection Fraction. *JAMA Cardiol.* Published March 27, 2024.  
doi:10.1001/jamacardio.2024.0284

### Data

**Data available:** No
